# Supplementary material
Source: HighWire-hosted journal article supplement (https://fn.bmj.com/content/108/3/272)
Supplement: inline-supplementary-material-1 [file inline-supplementary-material-1.pdf]

MAGPIE Study Supplementary materials  
MAGPIE Cohort info.docx

*Contents:*

|                                                                        |   |               |
|------------------------------------------------------------------------|---|---------------|
| <i>OVERALL COHORT INFORMATION</i>                                      |   |               |
| <i>NICU Site coding (table)</i>                                        | - | <i>Page 2</i> |
| <i>Samples collected per NICU site (figure)</i>                        | - | <i>Page 3</i> |
| <i>ANALYSIS COHORT INFORMATION</i>                                     |   |               |
| <i>Longitudinal samples received by NICU site (figure &amp; table)</i> | - | <i>Page 4</i> |
| <i>Infants recruited to each trial arm (figure)</i>                    | - | <i>Page 5</i> |
| <i>Samples per timepoint (figures)</i>                                 | - | <i>Page 6</i> |
| <i>VOC analysis cohort (table)</i>                                     | - | <i>Page 7</i> |
| <i>LCMS analysis cohort (table)</i>                                    | - | <i>Page 7</i> |

*NICU Site coding table*

| <b><i>Participating NICU</i></b>     | <b><i>Site code</i></b> |
|--------------------------------------|-------------------------|
| Royal Victoria Infirmary, Newcastle  | A                       |
| City Hospital Sunderland             | B                       |
| University Hospital of North Tees    | C                       |
| James Cook University Hospital       | D                       |
| Bradford Royal Infirmary             | E                       |
| Leeds General Infirmary              | F                       |
| Queen's Medical Centre, Nottingham   | G                       |
| Nottingham City Hospital             | H                       |
| Birmingham Women's Hospital          | I                       |
| Jessop Wing, Sheffield               | J                       |
| Leicester Royal Infirmary            | K                       |
| Queen Alexandra Hospital, Portsmouth | P                       |
| Princess Anne Hospital, Southampton  | S                       |

Table shows NICU sites participating in MAGPIE study and associated site codes referred to in analysis

Samples collected per NICU site

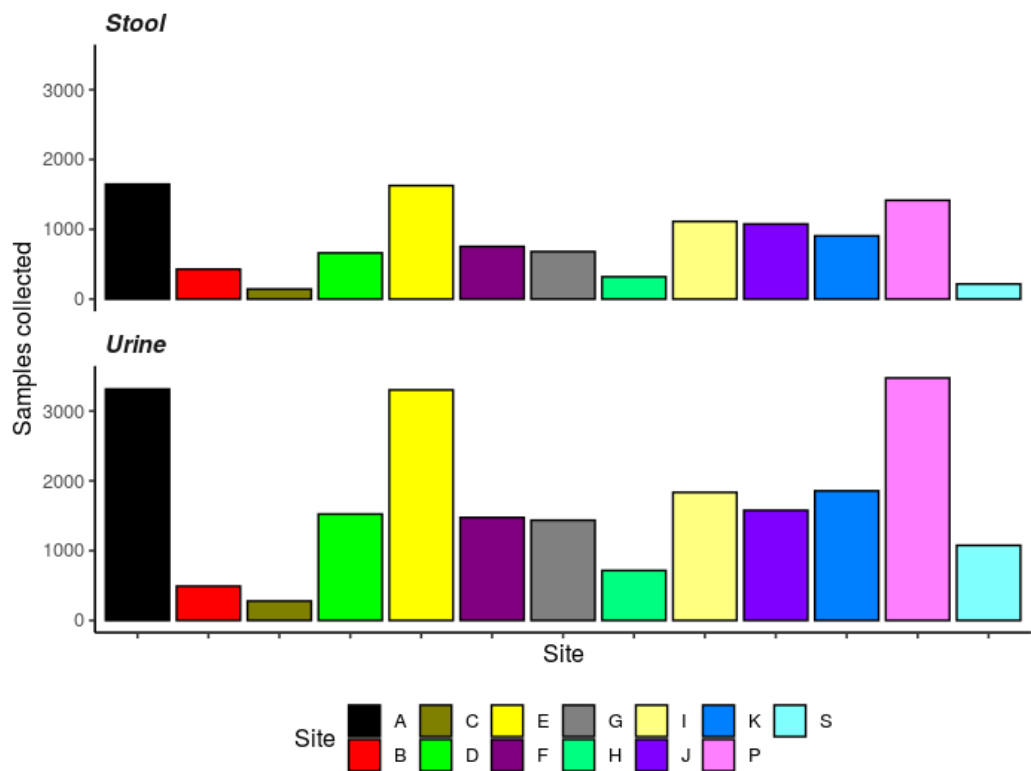

Figure shows total number of stools (upper panel) and urines (lower panel) collected per site during 2 year sampling period of MAGPIE study

Longitudinal samples received by NICU site (figure)

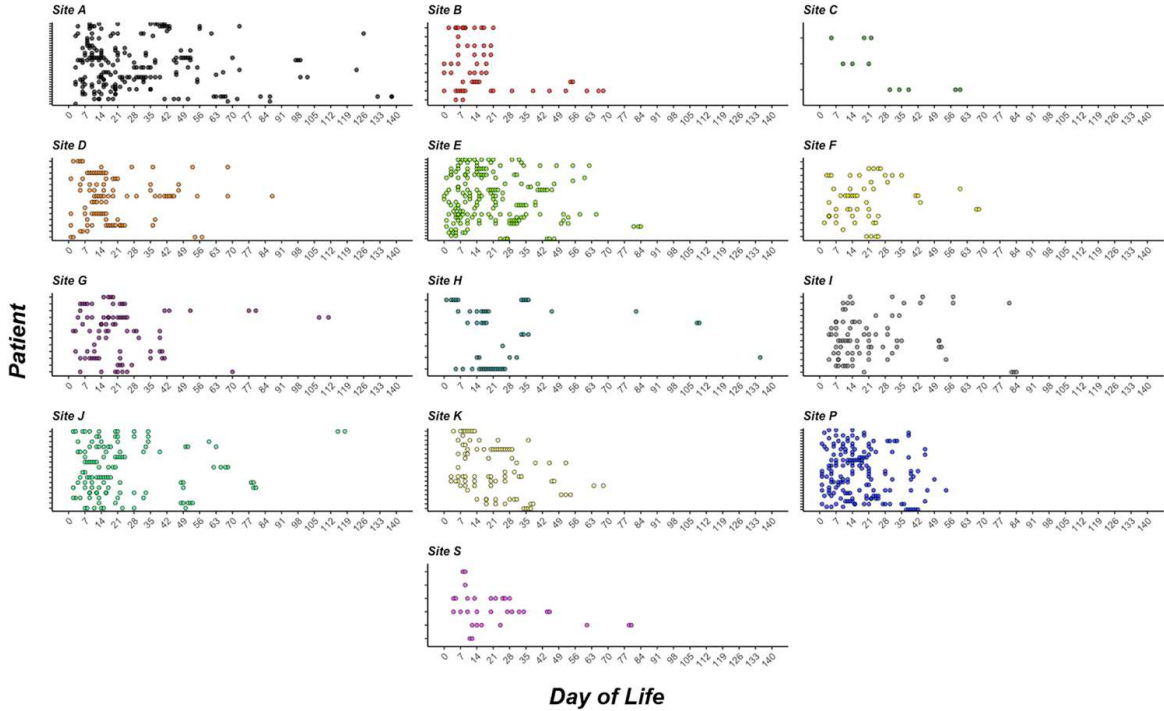

Figure illustrates longitudinal sampling across each of 13 NICU sites involved in MAGPIE recruitment. Each point represents an individual sample selected for analysis. Each panel of the figure represents a different NICU site. Samples are arranged in rows which distinguish samples obtained from one infant or another. Table below numerically outlines the data presented above.

| NICU Site | Samples Analysed | Number of Patients |
|-----------|------------------|--------------------|
| Site A    | 205              | 34                 |
| Site B    | 57               | 9                  |
| Site C    | 11               | 3                  |
| Site D    | 95               | 14                 |
| Site E    | 187              | 27                 |
| Site F    | 56               | 12                 |
| Site G    | 83               | 12                 |
| Site H    | 61               | 7                  |
| Site I    | 80               | 13                 |
| Site J    | 123              | 16                 |
| Site K    | 88               | 18                 |
| Site P    | 171              | 30                 |
| Site S    | 32               | 6                  |

Infants recruited to each trial arm

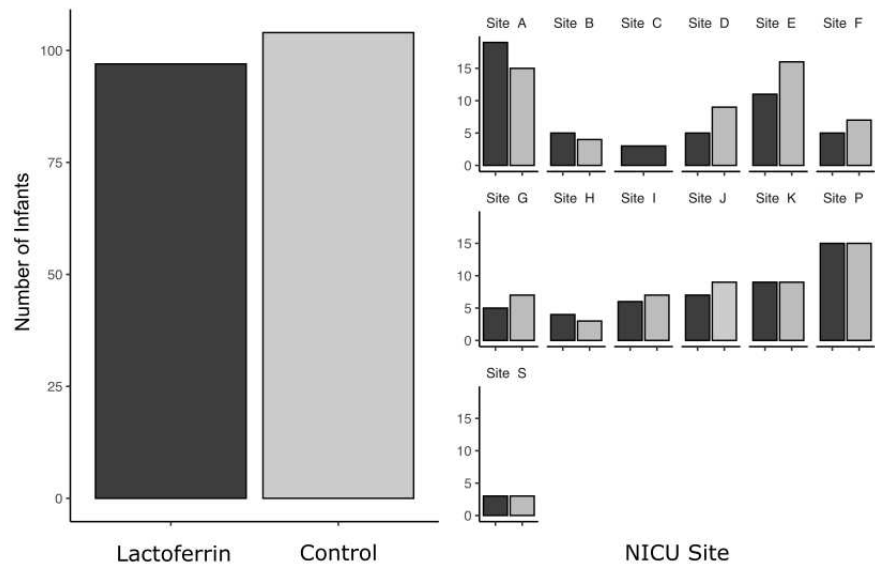

Figure shows number of infants recruited to each trial arm in the MAGPIE analysis cohort overall (left panel) and when stratified by NICU site (right panel).

Samples per timepoint

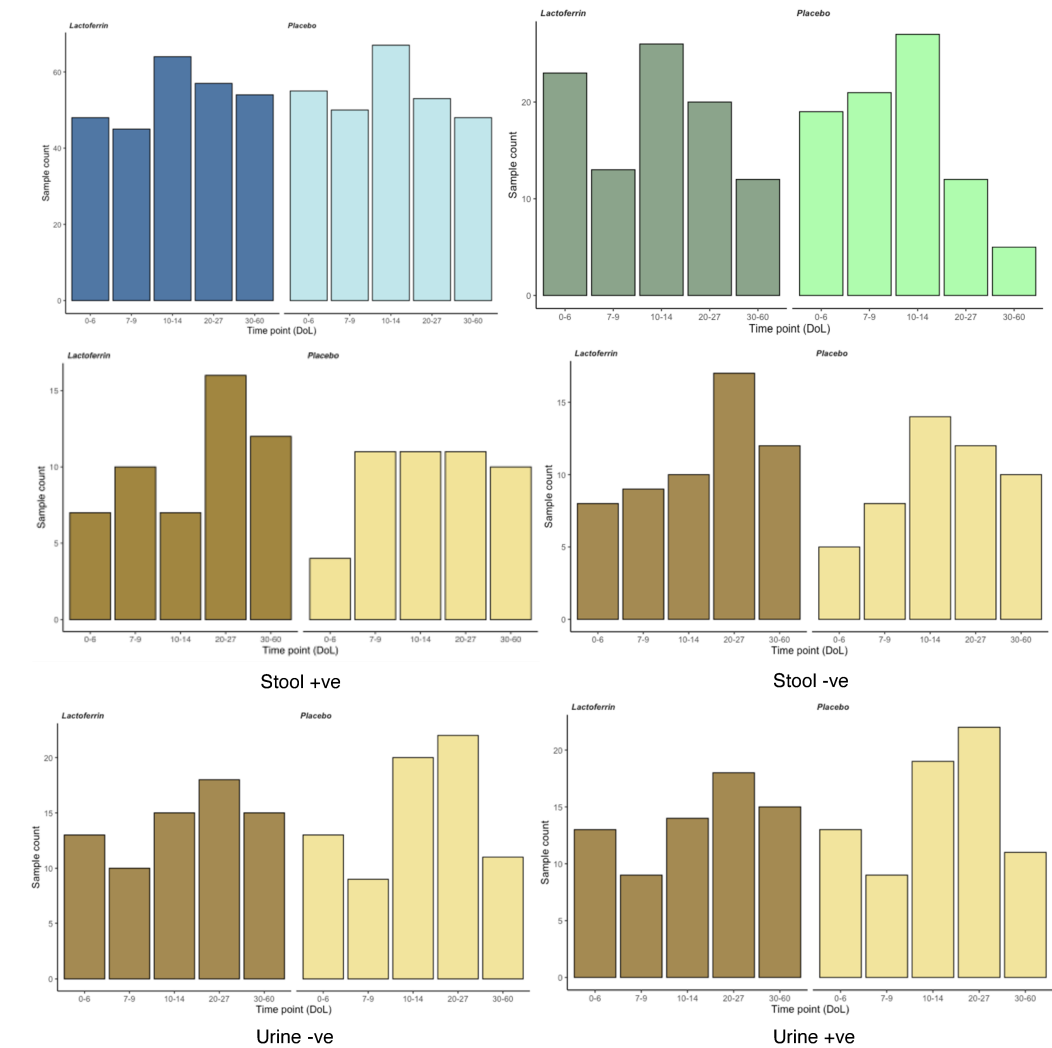

Figure shows number of samples included in MAGPIE analysis cohort at each of 5 pre-determined analysis timepoints. Sample numbers are stratified and shaded by intervention trial arm (dark = lactoferrin; light = placebo) and coloured by analysis mode (blue = microbiota; green = VOC; yellow = metabolites)

## VOC Cohort

| VOC                        |            |              | <i>Stool</i> |
|----------------------------|------------|--------------|--------------|
| samples ( <i>infants</i> ) | ALL        | <i>Total</i> | 317 (117)    |
|                            |            | <i>LF</i>    | 154 (62)     |
|                            |            | <i>Ctrl</i>  | 160 (55)     |
|                            | No Disease | <i>Total</i> | 168 (69)     |
|                            |            | <i>LF</i>    | 84 (38)      |
|                            |            | <i>Ctrl</i>  | 84 (31)      |

|                                  |              |              |
|----------------------------------|--------------|--------------|
| <i>Metabolite features (IQR)</i> | <i>Total</i> | 36           |
|                                  | <i>LF</i>    | 20 (14-25)   |
|                                  | <i>Ctrl</i>  | 20 (16 - 24) |

Tables illustrate the number of samples (and infants) included in each trial arm of VOC (above) and LCMS (below) analysis cohorts.

## LCMS Cohort

| LCMS                |              | <i>Stool</i> |            | <i>Urine</i> |            |          |
|---------------------|--------------|--------------|------------|--------------|------------|----------|
|                     |              | <i>pos</i>   | <i>neg</i> | <i>pos</i>   | <i>neg</i> |          |
| samples (infants)   | ALL          | <b>Total</b> | 170 (80)   | 176 (81)     | 232 (93)   | 236 (93) |
|                     |              | <b>LF</b>    | 82 (38)    | 85 (39)      | 106 (43)   | 109 (44) |
|                     |              | <b>Ctrl</b>  | 88 (42)    | 91 (42)      | 126 (48)   | 127 (48) |
|                     | No Disease   | <b>Total</b> | 124 (52)   | 125 (52)     | 152 (53)   | 154 (53) |
|                     |              | <b>LF</b>    | 57 (25)    | 57 (25)      | 62 (26)    | 63 (26)  |
|                     |              | <b>Ctrl</b>  | 67 (27)    | 68 (27)      | 90 (27)    | 91 (27)  |
| Metabolite features | <b>Total</b> | 5263         | 3510       | 4908         | 3974       |          |
